# Supplementary material for: Light reharvesting and enhanced efficiency of dye-sensitized solar cells based 3D-CNT/graphene counter electrodes
Source: Royal Society of Chemistry journal article supplement (doi:10.1039/c5ta02214b), 2015-01-01
Supplement: c5ta02214b1.pdf [file c5ta02214b1.pdf]

## Supporting Information

### **Light Re-harvesting and Enhanced Efficiency of Dye-sensitized Solar Cells Based 3D-CNT/graphene Counter Electrodes**

Jie Ma<sup>a\*</sup>, Wei Shen<sup>a</sup>, Cheng Li<sup>a</sup>, Fei Yu<sup>a, b\*</sup>

*<sup>a\*</sup> State Key Laboratory of Pollution Control and Resource Reuse, School of Environmental Science and Engineering, Tongji University, 1239 Siping Road, Shanghai 200092, P. R. of China.*

*Tel: 86-21-6598 1831; E-mail: jma@tongji.edu.cn*

*<sup>b</sup> College of Chemistry and Environmental Engineering, Shanghai Institute of Technology, Shanghai 2001418, China; E-mail: fyu@vip.163.com*

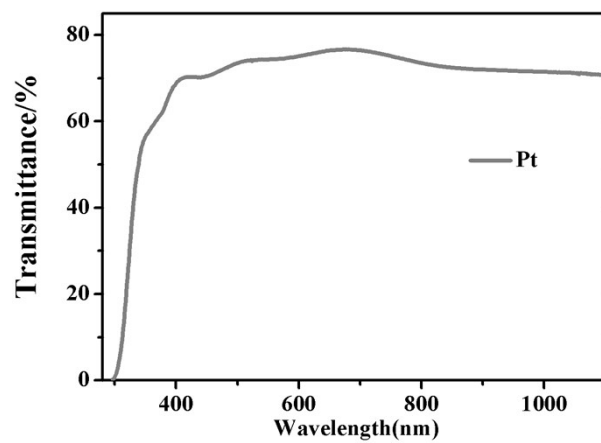

Fig. S1 UV-Vis transmittance spectra of Pt counter electrode

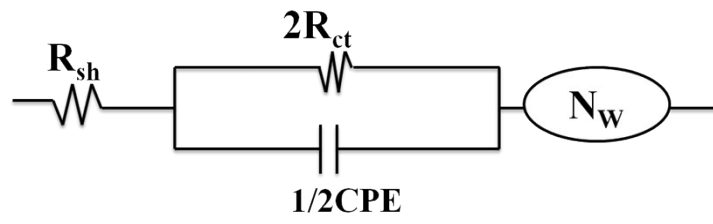

Fig. S2 Corresponding equivalent circuit of the EIS for MCG dummy cells

Table S1. Photovoltaic performance of DSSCs with different CEs.

| CEs              | $V_{oc}$<br>(V) | $J_{sc}$<br>(mA·cm <sup>2</sup> ) | $\Delta J$ (mA·cm <sup>2</sup> ) | Improvement<br>( $\Delta J/J_{sc}$ ) | FF(%) | $\eta$ (%) |
|------------------|-----------------|-----------------------------------|----------------------------------|--------------------------------------|-------|------------|
| T <sub>72%</sub> | 0.726           | 15.93                             |                                  |                                      | 40.0  | 4.63       |
| With a mirror    | 0.735           | 18.07                             | 2.14                             | 13.4%                                | 39.1  | 5.19       |
| T <sub>60%</sub> | 0.732           | 16.92                             |                                  |                                      | 46.0  | 5.70       |
| With a mirror    | 0.731           | 18.63                             | 1.71                             | 10.1%                                | 45.2  | 6.15       |
| T <sub>50%</sub> | 0.754           | 16.70                             |                                  |                                      | 49.1  | 6.19       |
| With a mirror    | 0.750           | 17.86                             | 1.16                             | 6.9%                                 | 48.4  | 6.41       |
| T <sub>40%</sub> | 0.733           | 17.02                             |                                  |                                      | 54.5  | 6.80       |
| With a mirror    | 0.729           | 18.22                             | 1.20                             | 7.1%                                 | 53.7  | 7.13       |
| T <sub>30%</sub> | 0.730           | 17.16                             |                                  |                                      | 59.1  | 7.40       |
| With a mirror    | 0.733           | 17.93                             | 0.83                             | 4.8%                                 | 58.7  | 7.70       |
| T <sub>20%</sub> | 0.762           | 15.60                             |                                  |                                      | 62.5  | 7.42       |
| With a mirror    | 0.762           | 15.92                             | 0.32                             | 2%                                   | 62.2  | 7.54       |
| T <sub>11%</sub> | 0.732           | 17.03                             |                                  |                                      | 61.1  | 7.62       |
| With a mirror    | 0.732           | 17.63                             | 0.6                              | 3.5%                                 | 58.9  | 7.60       |
| Pt               | 0.767           | 16.26                             |                                  |                                      | 55.3  | 6.90       |
| With a mirror    | 0.769           | 18.13                             | 1.87                             | 11.5%                                | 54.3  | 7.58       |
